# Supplementary material
Source: publisher site journal article supplement (https://www.spandidos-publications.com/8222/downloadSupplementary)
Supplement: Supplementary file 1 [file downloadSupplementary]

**Table SI.** miRNAs regulate tumor progression, metastasis or therapy resistance by targeting IGF1R.

| <b>miRNAs</b> | <b>Functions in cancer progression</b>                                                                                                                                                                                                                                                                                                                                                                                      |
|---------------|-----------------------------------------------------------------------------------------------------------------------------------------------------------------------------------------------------------------------------------------------------------------------------------------------------------------------------------------------------------------------------------------------------------------------------|
| miR-770-5p    | miR-770-5p restoration overcomes trastuzumab resistance in breast cancer by simultaneously suppressing HER2/EGFR/IGF1R crosstalk and downstream AKT/ERK/mTOR signaling pathways. This miRNA-mediated multipathway inhibition provides a potential strategy to reverse therapeutic resistance in HER2-positive breast cancers (55).                                                                                          |
| miRNA-376a-3p | miRNA-376a-3p overexpression reverses CPT-11 resistance in colorectal cancer by suppressing IGF1R-mediated PI3K/AKT signaling, thereby promoting apoptosis and inhibiting epithelial-mesenchymal transition. Therapeutic targeting of this miRNA-IGF1R axis may provide a strategy to overcome chemoresistance in advanced CRC (47).                                                                                        |
| miRNA-133b    | The Aloin and CPT-11 combination synergistically inhibits colorectal cancer progression by upregulating miR-133b, leading to suppression of IGF1R and its downstream PI3K/AKT/mTOR and MEK/ERK signaling pathways. This dual regulatory mechanism enhances apoptosis and reduces cell viability, presenting a novel combinatorial strategy to overcome chemoresistance in CRC (35).                                         |
| miR-15b       | Calorie restriction exerts antitumor effects in TNBC by upregulating miR-15b expression, which directly targets and downregulates IGF1R signaling. This miRNA-mediated suppression of the IGF1 pathway represents a potential therapeutic strategy to mimic the anticancer benefits of calorie restriction in TNBC (56).                                                                                                    |
| miR-99b-5p    | Exosomal miR-99b-5p derived from human bone marrow mesenchymal stem cells suppresses prostate cancer progression by directly targeting and downregulating IGF1R expression, thereby inhibiting tumor cell proliferation, migration and epithelial-mesenchymal transition. This stem cell-mediated intercellular communication represents a novel therapeutic approach for IGF1R-driven cancers through miRNA delivery (57). |
| miR-144       | miR-144 acts as a tumor suppressor in CRC by directly targeting NUDCD1, leading to subsequent inhibition of the IGF1R-ERK1/2 signaling pathway and suppression of tumor proliferation and metastasis. This newly identified miR-144/NUDCD1/IGF1R regulatory axis represents a promising therapeutic target for intervening in CRC progression (58).                                                                         |
| miR-98-5p     | The miR-98-5p/IGF2 axis contributes to Herceptin resistance in HER2-positive breast cancer by promoting IGF1R/HER2 heterodimer formation and subsequent AKT/mTOR pathway activation. Restoration of miR-98-5p expression sensitizes resistant cells to Herceptin by targeting IGF2, presenting a promising therapeutic strategy to overcome trastuzumab resistance (46).                                                    |
| miR-520b      | miR-520b enhances doxorubicin sensitivity in breast cancer by directly targeting and downregulating IGF-1R expression, thereby suppressing the PI3K/AKT signaling pathway and promoting tumor cell apoptosis. This miRNA-mediated regulation of IGF-1R represents a potential therapeutic strategy to overcome chemoresistance in breast cancer treatment (59).                                                             |
| miR-99a       | miR-99a acts as a tumor suppressor in cervical cancer by directly targeting and downregulating IGF1R expression, thereby inhibiting cell proliferation and migration while promoting apoptosis. Restoration of miR-99a function presents a potential therapeutic strategy to counteract IGF1R-driven oncogenic signaling in cervical malignancies (60).                                                                     |
| miR-194-5p    | NF- $\kappa$ B-mediated suppression of miR-194-5p drives ovarian tumorigenesis by unleashing IGF1R and PPFIBP expression, resulting in enhanced cancer cell proliferation, invasion and metastasis. This multi-layer regulatory axis reveals novel therapeutic opportunities for targeting transcriptional and post-transcriptional mechanisms in ovarian cancer progression (61).                                          |

miR/miRNA, microRNA; IGF-1R, insulin-like growth factor 1 receptor; CRC, colorectal cancer; TNBC, triple-negative breast cancer.
